# Supplementary material for: Chemotherapy of HER2- and MDM2-Enriched Breast Cancer Subtypes Induces Homologous Recombination DNA Repair and Chemoresistance
Source: MDPI journal article supplement (doi:10.3390/cancers13184501), 2021-09-07
Supplement: s1 [file s1]

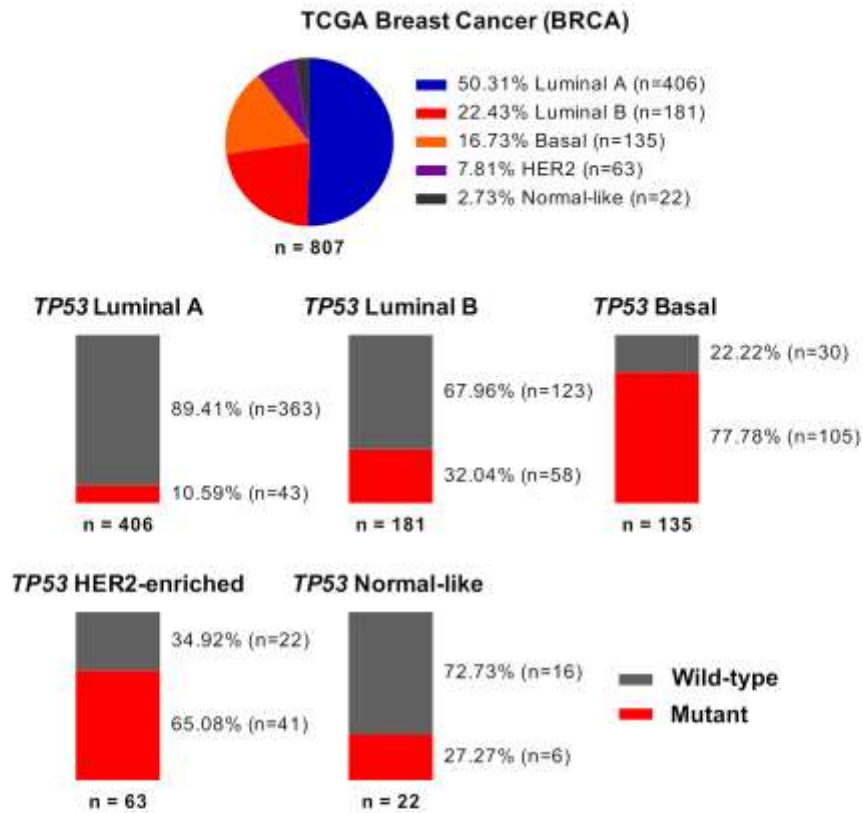

Figure S1. TCGA Breast Cancer (BRCA) dataset details. Percentage of different molecular subtypes of breast cancer in the dataset (top panel). Percentage of wild-type and mutant *TP53* in the specific subtype (bottom panel).

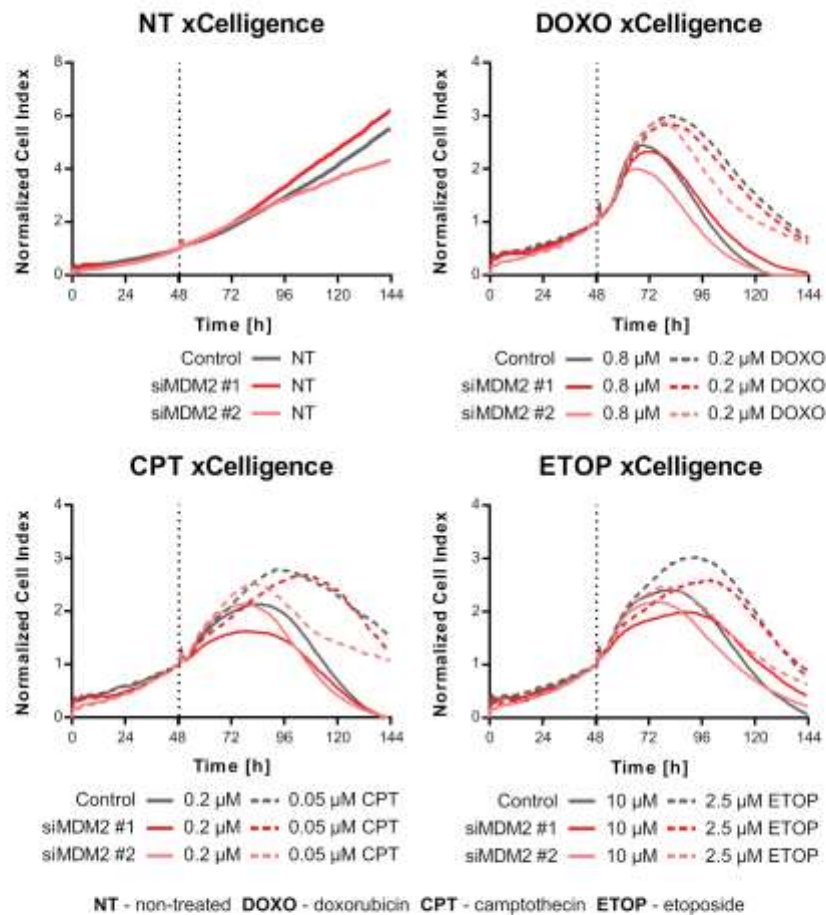

**Figure S2. Real-time monitoring of SKBR3 cells growth after MDM2 gene silencing and treatment.** Real-time proliferation monitoring was performed with the xCelligence System, SKBR3 cells were first transfected with specific siRNA and then treated with the indicated chemioterapeutic agent. Control indicates transfection with non-specific siRNA.
